# Supplementary material
Source: publisher site journal article supplement (https://www.dovepress.com/article/326385)
Supplement: Supplementary file 1 [file get_supplementary_file.php]

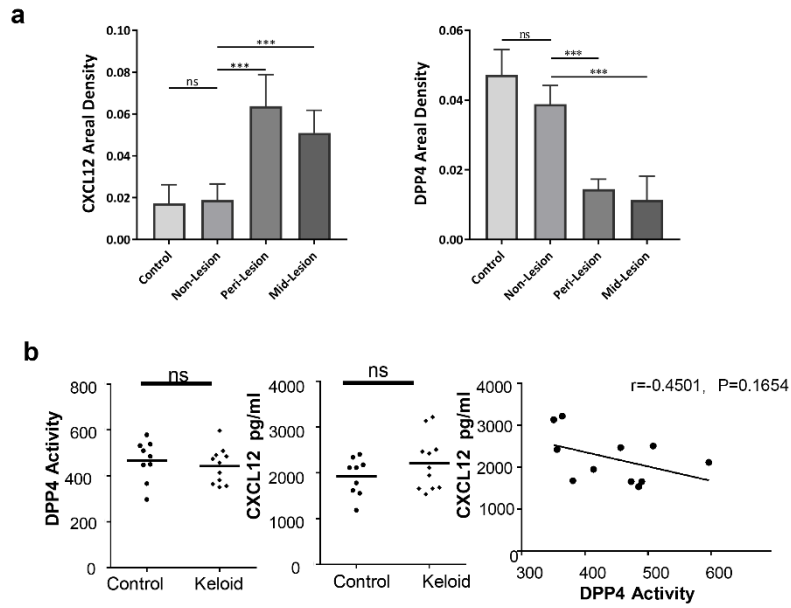

Supplement Fig.S1

a. Statistical analyzes of CXCL12 and DPP4 staining density in mature scar tissue and different sites of keloid scar.

b. Quantification of DPP4 activity (microunit/ml) and CXCL12 (pg/ml) in plasma from health subjects and keloid patients. Correlation analysis of DPP4 activity and CXCL12 was performed in each group. Data for 9 healthy controls and 11 patients with KD.

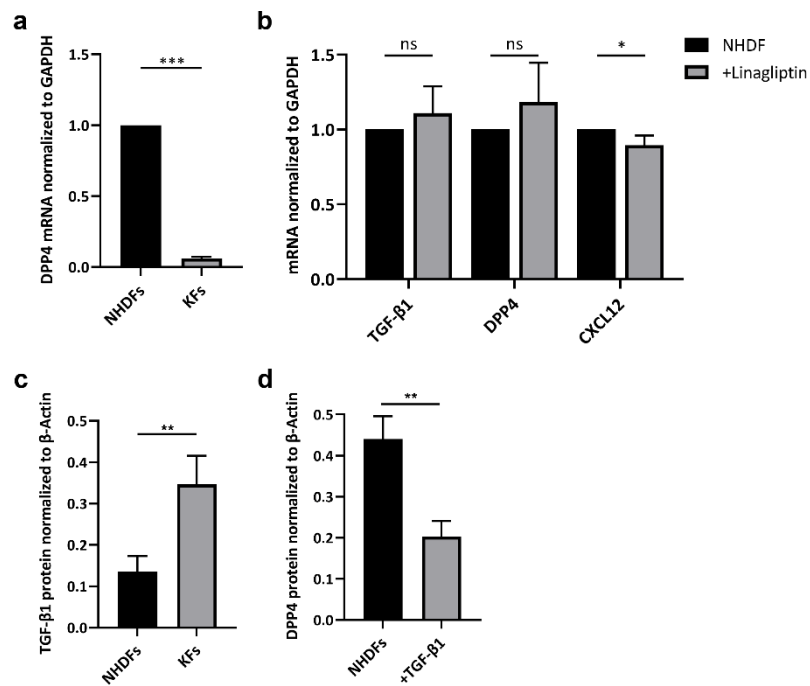

Supplement Fig.S2

a. Real-time PCR analyses of DPP4 in normal fibroblasts and keloid fibroblasts. \*\*\*=P < 0.001.

b. Real-time PCR analyses of TGF-β1, CXCL12 and DPP4 in normal fibroblasts after linagliptin treatment. ns= P>0.05, \*=P < 0.05.

c. Densitometric analysis of TGF-β1 expression relative to β-Actin expression. Each bar represents the mean of three replicates of TGF-β1 band intensity normalized to β-Actin band intensity. \*\*=P < 0.01.

d. Densitometric analysis of DPP4 expression relative to β-Actin expression. Each bar represents the mean of three replicates of DPP4 band intensity normalized to β-Actin band intensity. \*\*=P < 0.01.

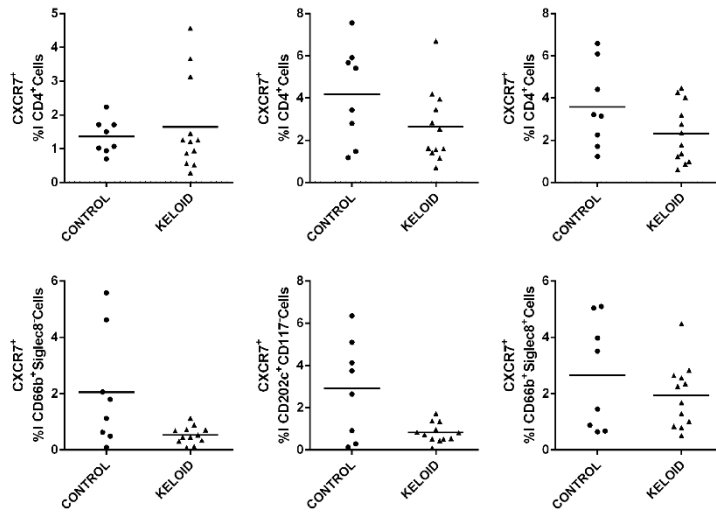

Supplement Figure S3

Expression of CXCR7 among circulating immune cells in keloid patients and healthy subjects

Table S1. Demographic characteristics

| No.  | Gender | Age | Diagnosis   | Location    | Duration | Cause   |
|------|--------|-----|-------------|-------------|----------|---------|
| K9   | Female | 31  | Keloid      | Chest       | 37       | Acne    |
| K10  | Female | 25  | Keloid      | Back        | 20       | Acne    |
| K12  | Female | 28  | Keloid      | Chest       | 42       | Acne    |
| K13  | Female | 21  | Keloid      | Ear         | 18       | Trauma  |
| K15  | Female | 26  | Keloid      | Abdomen     | 29       | Trauma  |
| K17  | Male   | 22  | Keloid      | Chest       | 31       | Acne    |
| K19  | Female | 29  | Keloid      | Face        | 36       | Acne    |
| K20  | Female | 21  | Keloid      | Monsveneris | 41       | Acne    |
| K21  | Female | 28  | Keloid      | Chest       | 45       | Acne    |
| K25  | Male   | 23  | Keloid      | Chest       | 12       | Surgery |
| K24  | Female | 22  | Keloid      | Monsveneris | 22       | Acne    |
| K67  | Male   | 32  | Keloid      | Chest       | 41       | Acne    |
| K6   | Male   | 29  | Keloid      | Axilla      | 37       | Trauma  |
| K9   | Female | 28  | Keloid      | Shoulder    | 24       | Trauma  |
| K30  | Male   | 22  | Keloid      | Chest       | 22       | Trauma  |
| K37  | Female | 24  | Keloid      | Chest       | 22       | Surgery |
| K38  | Female | 30  | Keloid      | Shoulder    | 23       | Acne    |
| M71  | Female | 25  | Mature Scar | Shoulder    | 33       | Trauma  |
| M72  | Female | 27  | Mature Scar | abdomen     | 8        | Surgery |
| M73  | Male   | 28  | Mature Scar | abdomen     | 11       | Surgery |
| M77  | Female | 22  | Mature Scar | Face        | 10       | Surgery |
| M78  | Female | 30  | Mature Scar | abdomen     | 6        | Surgery |
| M79  | Female | 22  | Mature Scar | Leg         | 6        | Trauma  |
| M82  | Female | 26  | Mature Scar | Sternum     | 7        | Surgery |
| M90  | Male   | 28  | Mature Scar | abdomen     | 11       | Surgery |
| M94  | Male   | 29  | Mature Scar | abdomen     | 2        | Trauma  |
| M96  | Female | 24  | Mature Scar | Shoulder    | 3        | Trauma  |
| M101 | Female | 23  | Mature Scar | face        | 1        | Surgery |
| M102 | Female | 30  | Mature Scar | face        | 1        | Surgery |
| M111 | Female | 29  | Mature Scar | face        | 2        | Surgery |

Table S2. Primers

| Gene   | Forward                 | Reverse                 |
|--------|-------------------------|-------------------------|
| TGFB1  | CAATTCCTGGCGATACCTCAG   | GCACAACTCCGGTGACATCAA   |
| CXCL12 | ATTCTCAACACTCCAAACTGTGC | ACTTTAGCTTCGGGTCAATGC   |
| DPP4   | AGTGGCACGGCAACACATT     | AGAGCTTCTATCCCGATGACTT  |
| ACTB   | CATGTACGTTGCTATCCAGGC   | CTCCTTAATGTCACGCACGAT   |
| GADPH  | GGAGCGAGATCCCTCCAAAAT   | GGCTGTTGTCATACTTCTCATGG |

Table S3. Antibodies

| Target   | Host   | Clone      | Format          | Company     | Cat.no.    | Appl.  |
|----------|--------|------------|-----------------|-------------|------------|--------|
| CXCL12   | Mouse  | 79018      |                 | R&D         | MAB350     | IHC    |
| DPP4     | Goat   | Polyclonal |                 | R&D         | AF1180     | IHC/IF |
| DPP4     | Rabbit | EPR5883    |                 | Abcam       | ab129060   | WB     |
| DPP4     | Mouse  | BA5b       | PE              | Biologend   | 302705     | FCM    |
| TGF-B1   | Mouse  | 3C11       |                 | Santa Cruz  | sc-130348  | WB/IF  |
| p-Smad2  | Rabbit | 138D4      |                 | CST         | 3108       | WB     |
| smad2    | Rabbit | D43B4      |                 | CST         | 5339       | WB     |
| S100A4   | Rabbit | EPR2761    |                 | Abcam       | ab124805   | IF     |
| CXCR4    | Mouse  | 44716      |                 | R&D         | MAB172     | IHC/IF |
| CXCR4    | Rabbit | UMB2       |                 | Abcam       | ab124824   | IHC/IF |
| CXCR4    | Goat   | Polyclonal |                 | Abcam       | ab1670     | IHC/IF |
| CXCR7    | Mouse  | 11G8       |                 | R&D         | MAB42273   | IHC/IF |
| CXCR7    | Rabbit | Polyclonal |                 | Proteintech | 20423-1-AP | IHC/IF |
| CD3      | Rabbit | SP7        |                 | MXB         | Kit-0003   | IF     |
| CD20     | Mouse  | L26        |                 | MXB         | Kit-0001   | IF     |
| CD68     | Mouse  | KP1        |                 | MXB         | Kit-0026   | IF     |
| CD117    | Rabbit | YR145      |                 | Abcam       | ab32363    | IF     |
| CD45     | Mouse  | HI30       | BUV395          | BD          | 563792     | FCM    |
| CD184    | Mouse  | 12G5       | BV785           | Biologend   | 306530     | FCM    |
| CD187    | Mouse  | 10D1       | BV421           | BD          | 566234     | FCM    |
| CD4      | Mouse  | SK3        | BUV496          | BD          | 564651     | FCM    |
| CD8      | Mouse  | SK1        | APC-H7          | BD          | 561423     | FCM    |
| CD20     | Mouse  | 2H7        | BV650           | BD          | 563779     | FCM    |
| CD1c     | Mouse  | F10        | PE              | BD          | 564900     | FCM    |
| CD14     | Mouse  | M5E2       | AF700           | BD          | 557923     | FCM    |
| CD117    | Mouse  | YB5.B8     | PERCP-<br>CY5.5 | BD          | 562094     | FCM    |
| CD66b    | Mouse  | G10F5      | AF647           | BD          | 561645     | FCM    |
| CD203c   | Mouse  | NP4D6      | BV510           | Biologend   | 324622     | FCM    |
| Siglec-8 | Mouse  | 7C9        | PE-CY7          | Biologend   | 347112     | FCM    |
